# Supplementary material for: Preparation of metal oxide/polyaniline/N-MWCNT hybrid composite electrodes for electrocatalytic synthesis of ammonia at atmospheric pressure
Source: Royal Society of Chemistry journal article supplement (doi:10.1039/c8se00470f), 2018-11-03
Supplement: c8se00470f1.pdf [file c8se00470f1.pdf]

Electronic Supplementary Information

**Preparation of metal oxide/polyaniline/N-MWCNT hybrid composite electrodes for electrocatalytic synthesis of ammonia at atmospheric pressure**

Chan Hee Jung <sup>a, b</sup>, Chung-Yul Yoo<sup>a</sup>, Jong-Nam Kim<sup>a</sup>, Eun-Young Jeong<sup>a</sup>, Jong Hyun Park<sup>a</sup>,  
Hyung Chan Choi<sup>a</sup>, Moon-Hee Han<sup>\*b</sup>, Hyung Chul Yoon<sup>\*a</sup>

<sup>a</sup> Korea Institute of Energy Research, 152 Gajeong-ro Yuseong-gu, Daejeon, 305343, South Korea.

<sup>b</sup> Graduate School of Energy Science and Technology, Chungnam National University, 99 Daehak-ro, Yuseong-gu, Daejeon 34134, South Korea.

\*corresponding author: hyoon@kier.re.kr; mhhan@cnu.ac.kr

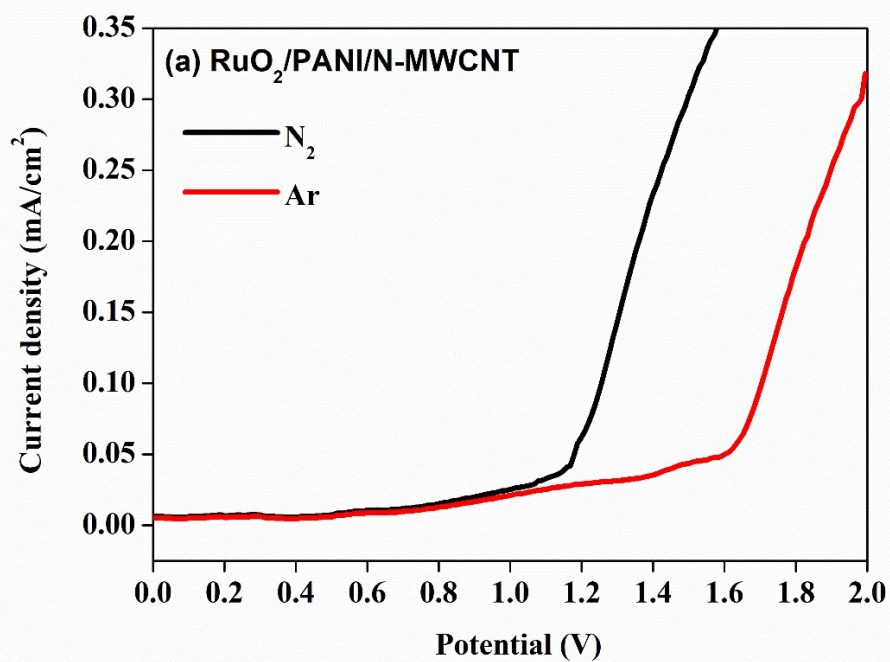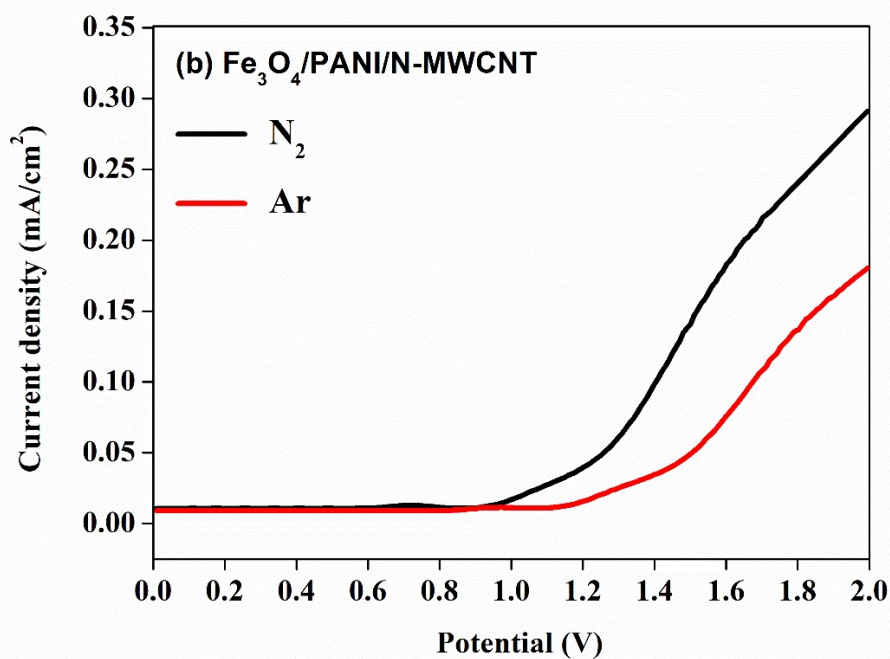

**Fig. S1.** LSV curves for (a)  $\text{RuO}_2/\text{PANI}/\text{N-MWCNT}$  and (b)  $\text{Fe}_3\text{O}_4/\text{PANI}/\text{N-MWCNT}$  electrocatalysts in the presence of argon and nitrogen.

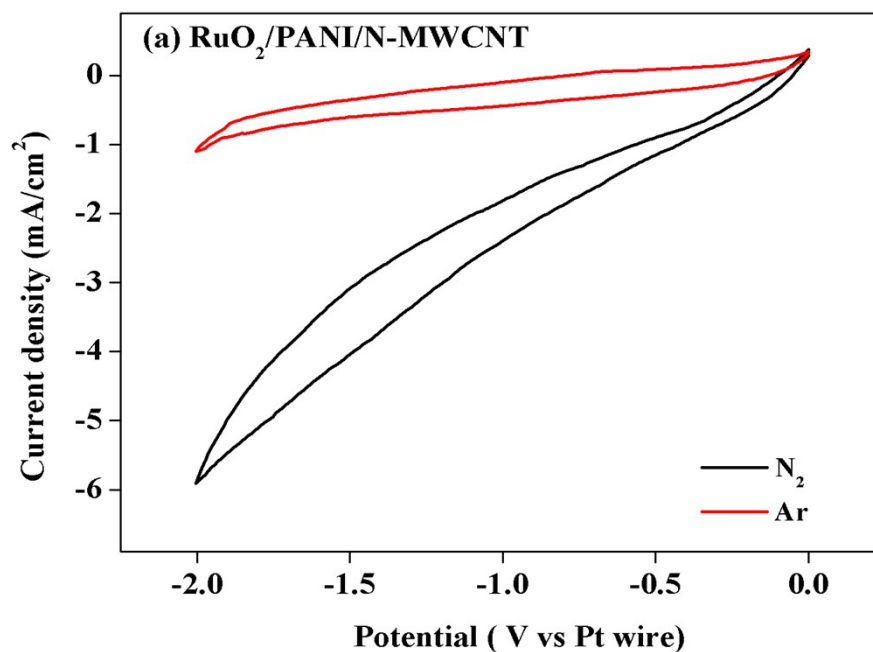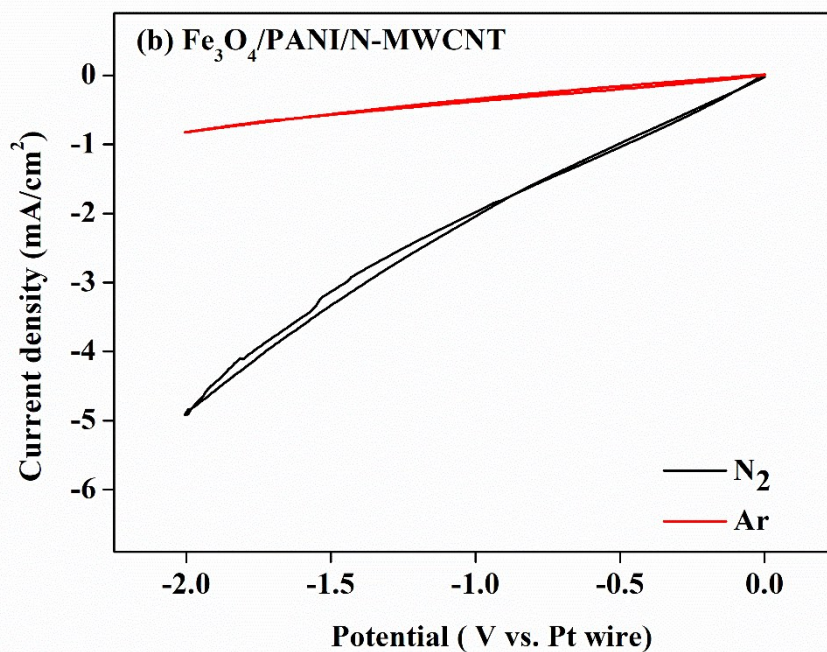

**Fig. S2.** CV curves for (a)  $\text{RuO}_2/\text{PANI}/\text{N-MWCNT}$  and (b)  $\text{Fe}_3\text{O}_4/\text{PANI}/\text{N-MWCNT}$  electrocatalysts in the presence of argon and nitrogen.

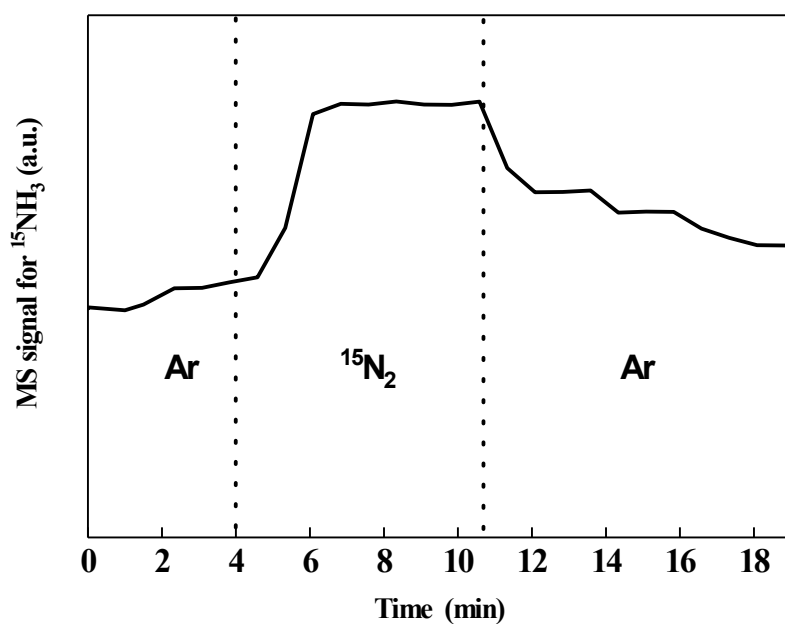

**Fig. S3.** Mass spectrometer signal of  $m/z=18$  for  $^{15}\text{NH}_3$  from the electrolytic cell with  $\text{RuO}_2/\text{PANI}/\text{N-MWCNT}$  during potentiostatic electrolysis with supply of Ar or  $^{15}\text{N}_2$  at a cell voltage of 1.2 V and 25°C.

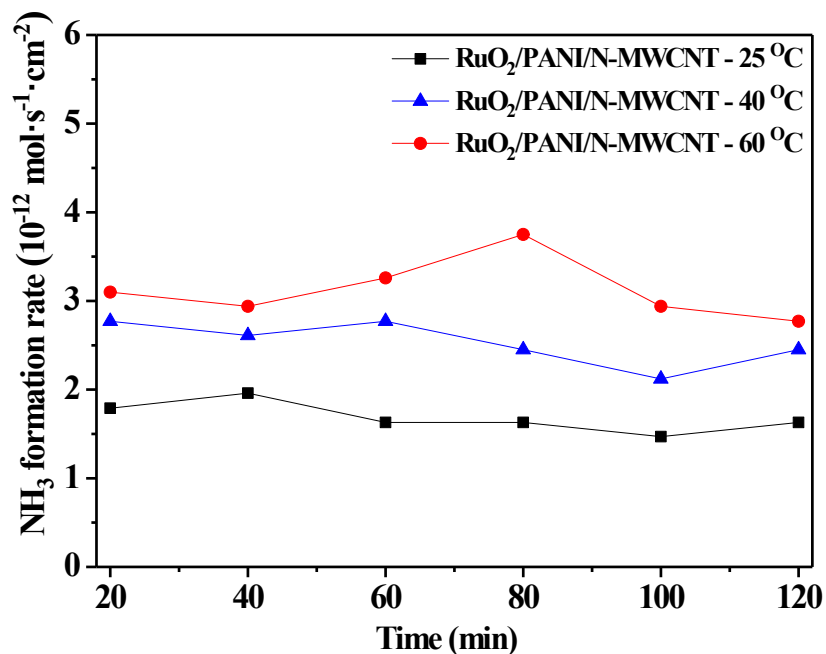

**Fig. S4.** Results of continuous  $\text{N}_2$  reduction over 2 h using an electrolysis cell with  $\text{RuO}_2/\text{PANI}/\text{N-MWCNT}$  in the temperature range of 25–60°C at an applied potential of 1.2 V.

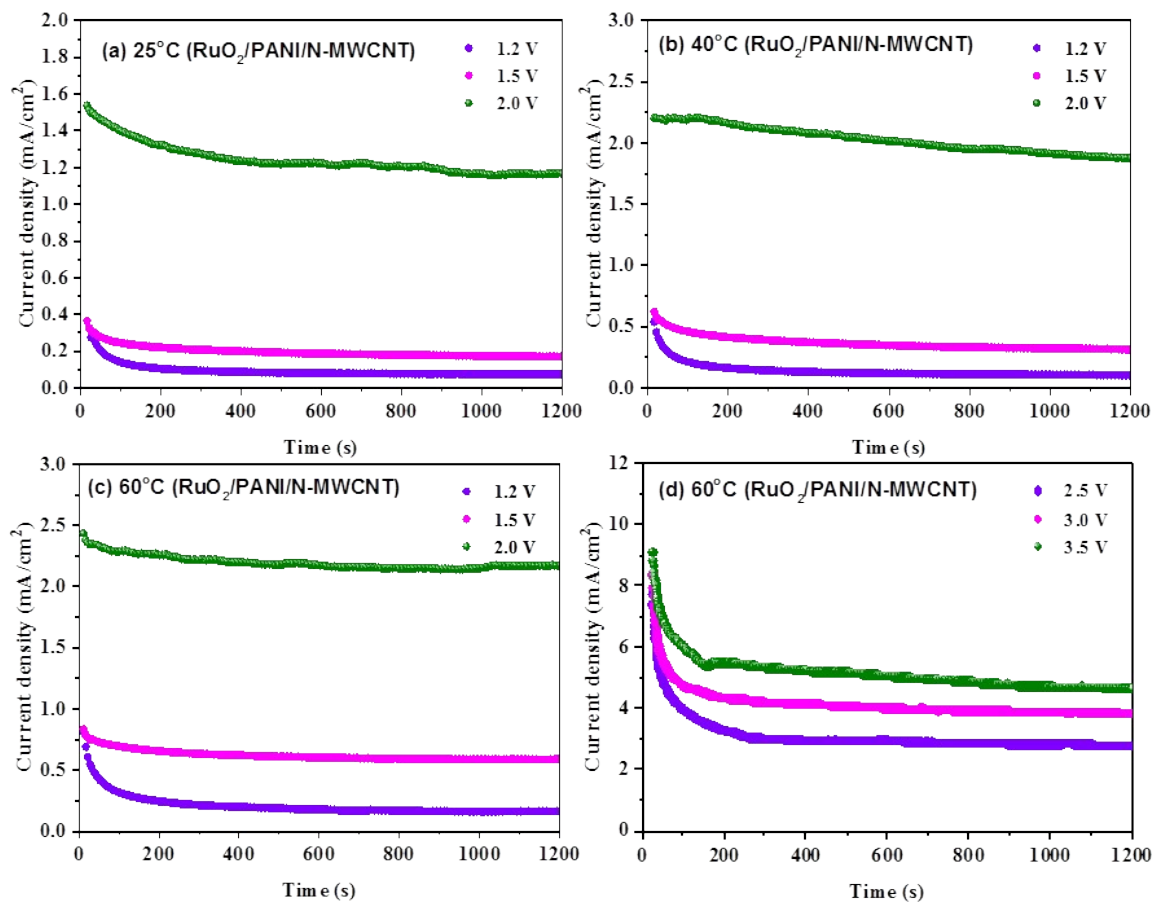

Fig. S5. Trend of current density versus time for the RuO<sub>2</sub>/PANI/N-MWCNT electrocatalyst at different temperatures.

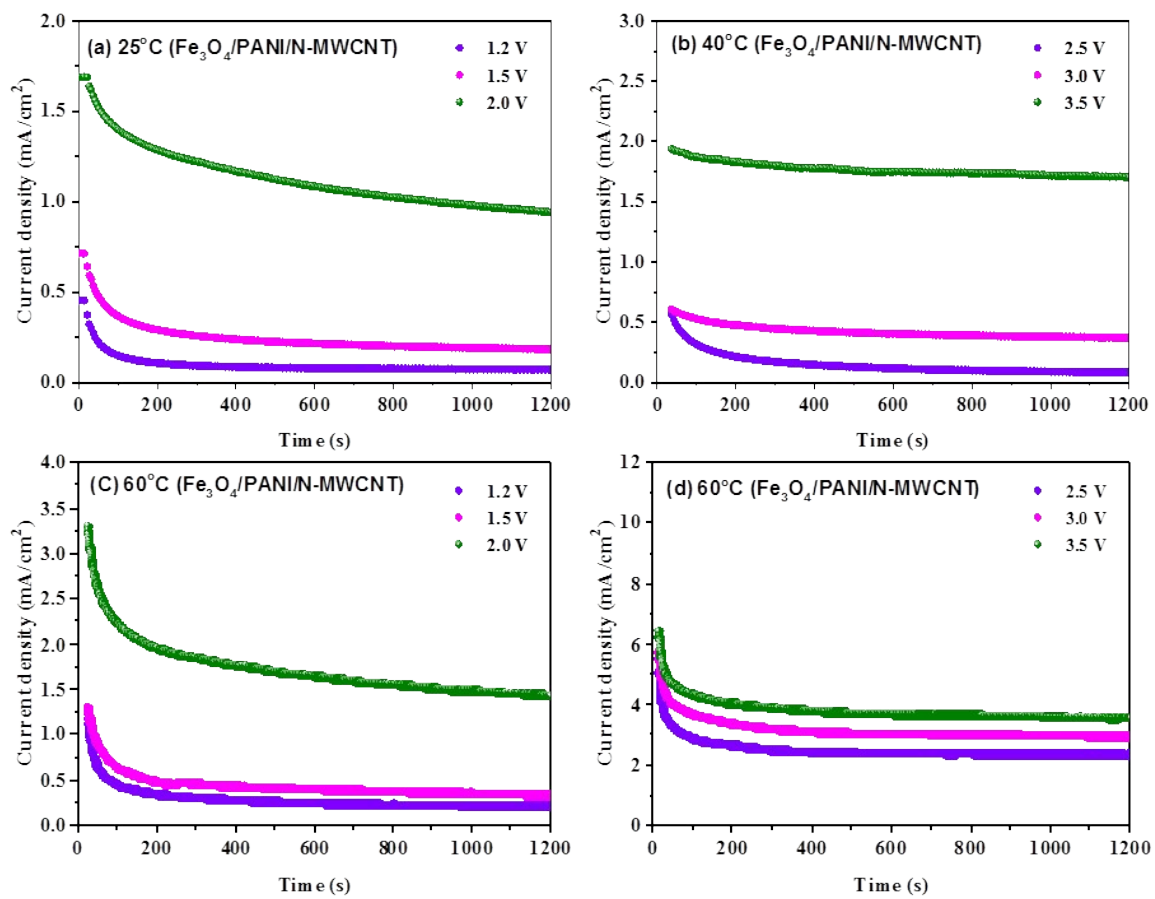

Fig. S6. Trend of current density versus time for the  $\text{Fe}_3\text{O}_4/\text{PANI}/\text{N-MWCNT}$  electrocatalyst at different temperatures.

Table S1. Overall faradaic efficiencies (H<sub>2</sub>+NH<sub>3</sub>) from the RuO<sub>2</sub>/PANI/N-MWCNT electrocatalyst under an applied potential of 1.2 – 2.0 V at 25°C

| Applied potential (V) | FE H <sub>2</sub> (%) | FE NH <sub>3</sub> (%) | Overall FE |
|-----------------------|-----------------------|------------------------|------------|
| 1.2                   | 98.11                 | 0.49                   | 98.6       |
| 1.5                   | 97.27                 | 0.34                   | 97.61      |
| 2.0                   | 94.53                 | 0.07                   | 94.60      |

\*Definition of faradaic efficiency of hydrogen production:

$$FE_{H_2} (\%) = \frac{R_{H_2}(\text{mol} \cdot \text{cm}^{-2} \cdot \text{s}^{-1}) \times t(\text{s}) \times S(\text{cm}^{-2}) \times F}{2 \times I(\text{A}) \times t(\text{s})} \times 100\%$$

where  $R_{H_2}$  is the hydrogen produced per electrode area (S) and time (t), I (A) is the average current during the reaction, and F is the Faraday constant.
